# Supplementary material for: E2F1-Mediated Induction of NFYB Attenuates Apoptosis via Joint Regulation of a Pro-Survival Transcriptional Program
Source: PubMed Central journal article supplement (PMC4454684; doi:10.1371/journal.pone.0127951), 2015-06-03
Supplement: pone.0127951.s005.pdf [file pone.0127951.s005.pdf]

**Cluster 1**

| Probe.Set.ID | Symbol  | Gene Title                                                                                                                  |
|--------------|---------|-----------------------------------------------------------------------------------------------------------------------------|
| 201625_s_at  | INSIG1  | insulin induced gene 1                                                                                                      |
| 202036_s_at  | SFRP1   | secreted frizzled-related protein 1                                                                                         |
| 202037_s_at  | SFRP1   | secreted frizzled-related protein 1                                                                                         |
| 202178_at    | PRKCZ   | protein kinase C, zeta                                                                                                      |
| 202460_s_at  | LPIN2   | lipin 2                                                                                                                     |
| 202842_s_at  | DNAJB9  | DnaJ (Hsp40) homolog, subfamily B, member 9                                                                                 |
| 202948_at    | IL1R1   | interleukin 1 receptor, type I                                                                                              |
| 203072_at    | MYO1E   | myosin IE                                                                                                                   |
| 203429_s_at  | SUCO    | chromosome 1 open reading frame 9                                                                                           |
| 203689_s_at  | FMR1    | fragile X mental retardation 1                                                                                              |
| 204062_s_at  | ULK2    | unc-51-like kinase 2 (C. elegans)                                                                                           |
| 204160_s_at  | ENPP4   | ectonucleotide pyrophosphatase/phosphodiesterase 4 (putative function)                                                      |
| 204479_at    | OSTF1   | osteoclast stimulating factor 1                                                                                             |
| 204720_s_at  | DNAJC6  | DnaJ (Hsp40) homolog, subfamily C, member 6                                                                                 |
| 205359_at    | AKAP6   | A kinase (PKA) anchor protein 6                                                                                             |
| 206233_at    | B4GALT6 | UDP-Gal:betaGlcNAc beta 1,4- galactosyltransferase, polypeptide 6                                                           |
| 206615_s_at  | ADAM22  | ADAM metallopeptidase domain 22                                                                                             |
| 207362_at    | SLC30A4 | solute carrier family 30 (zinc transporter), member 4                                                                       |
| 208925_at    | CLDND1  | claudin domain containing 1                                                                                                 |
| 208962_s_at  | FADS1   | fatty acid desaturase 1                                                                                                     |
| 208963_x_at  | FADS1   | fatty acid desaturase 1                                                                                                     |
| 208964_s_at  | FADS1   | fatty acid desaturase 1                                                                                                     |
| 209569_x_at  | NSG1    | Neuron specific gene family member 1                                                                                        |
| 209925_at    | OCLN    | occludin pseudogene; occludin                                                                                               |
| 209993_at    | ABCB1   | ATP-binding cassette, sub-family B (MDR/TAP), member 1                                                                      |
| 210355_at    | PTH1H   | parathyroid hormone-like hormone                                                                                            |
| 210829_s_at  | SSBP2   | single-stranded DNA binding protein 2                                                                                       |
| 210941_at    | PCDH7   | protocadherin 7                                                                                                             |
| 211130_x_at  | EDA     | ectodysplasin A                                                                                                             |
| 211478_s_at  | DPP4    | dipeptidyl-peptidase 4                                                                                                      |
| 212812_at    | SERINC5 | serine incorporator 5                                                                                                       |
| 212870_at    | SOS2    | son of sevenless homolog 2 (Drosophila)                                                                                     |
| 212959_s_at  | GNPTAB  | N-acetylglucosamine-1-phosphate transferase, alpha and beta subunits                                                        |
| 214023_x_at  | TUBB2B  | tubulin, beta 2B                                                                                                            |
| 214578_s_at  | ROCK1   | similar to Rho-associated, coiled-coil containing protein kinase 1; Rho-associated, coiled-coil containing protein kinase 1 |
| 215245_x_at  | FMR1    | fragile X mental retardation 1                                                                                              |
| 215363_x_at  | FOLH1   | folate hydrolase (prostate-specific membrane antigen) 1                                                                     |
| 215446_s_at  | LOX     | lysyl oxidase                                                                                                               |
| 216167_at    | LRRN2   | leucine rich repeat neuronal 2                                                                                              |
| 216205_s_at  | MFN2    | mitofusin 2                                                                                                                 |
| 216255_s_at  | GRM8    | glutamate receptor, metabotropic 8                                                                                          |
| 216256_at    | GRM8    | glutamate receptor, metabotropic 8                                                                                          |
| 218127_at    | NFYB    | nuclear transcription factor Y, beta                                                                                        |
| 218128_at    | NFYB    | nuclear transcription factor Y, beta                                                                                        |

|             |           |                                                             |
|-------------|-----------|-------------------------------------------------------------|
| 218129_s_at | NFYB      | nuclear transcription factor Y, beta                        |
| 218223_s_at | PLEKHO1   | pleckstrin homology domain containing, family O member 1    |
| 219526_at   | C14orf169 | chromosome 14 open reading frame 169                        |
| 219703_at   | MNS1      | meiosis-specific nuclear structural 1                       |
| 219932_at   | SLC27A6   | solute carrier family 27 (fatty acid transporter), member 6 |
| 221761_at   | ADSS      | adenylosuccinate synthase                                   |
| 222071_s_at | SLCO4C1   | solute carrier organic anion transporter family, member 4C1 |

### Cluster 2

| Probe.Set.ID | Symbol  | Gene Title                                                                                           |
|--------------|---------|------------------------------------------------------------------------------------------------------|
| 200927_s_at  | RAB14   | RAB14, member RAS oncogene family                                                                    |
| 201063_at    | RCN1    | reticulocalbin 1, EF-hand calcium binding domain                                                     |
| 201490_s_at  | PPIF    | peptidylprolyl isomerase F                                                                           |
| 201662_s_at  | ACSL3   | acyl-CoA synthetase long-chain family member 3                                                       |
| 201761_at    | MTHFD2  | methylenetetrahydrofolate dehydrogenase (NADP+ dependent) 2, methenyltetrahydrofolate cyclohydrolase |
| 202101_s_at  | RALB    | v-ral simian leukemia viral oncogene homolog B (ras related; GTP binding protein)                    |
| 202516_s_at  | DLG1    | discs, large homolog 1 (Drosophila)                                                                  |
| 203548_s_at  | LPL     | lipoprotein lipase                                                                                   |
| 203688_at    | PKD2    | polycystic kidney disease 2 (autosomal dominant)                                                     |
| 204298_s_at  | LOX     | lysyl oxidase                                                                                        |
| 205573_s_at  | SNX7    | sorting nexin 7                                                                                      |
| 206491_s_at  | NAPA    | N-ethylmaleimide-sensitive factor attachment protein, alpha                                          |
| 206683_at    | ZNF165  | zinc finger protein 165                                                                              |
| 208309_s_at  | MALT1   | mucosa associated lymphoid tissue lymphoma translocation gene 1                                      |
| 208703_s_at  | APLP2   | amyloid beta (A4) precursor-like protein 2                                                           |
| 209232_s_at  | DCTN5   | dynactin 5 (p25)                                                                                     |
| 209706_at    | NKX3-1  | NK3 homeobox 1                                                                                       |
| 211048_s_at  | PDIA4   | protein disulfide isomerase family A, member 4                                                       |
| 211804_s_at  | CDK2    | cyclin-dependent kinase 2                                                                            |
| 213369_at    | CDHR1   | protocadherin 21                                                                                     |
| 214959_s_at  | API5    | API5-like 1; apoptosis inhibitor 5                                                                   |
| 215489_x_at  | HOMER3  | homer homolog 3 (Drosophila)                                                                         |
| 217761_at    | ADI1    | acireductone dioxygenase 1                                                                           |
| 217931_at    | CNPY3   | canopy 3 homolog (zebrafish)                                                                         |
| 218095_s_at  | TMEM165 | transmembrane protein 165                                                                            |
| 219628_at    | ZMAT3   | zinc finger, matrin type 3                                                                           |
| 221318_at    | NEUROD4 | neurogenic differentiation 4                                                                         |
| 221781_s_at  | DNAJC10 | DnaJ (Hsp40) homolog, subfamily C, member 10                                                         |

### Cluster 3

| Probe.Set.ID | Symbol | Gene Title                                          |
|--------------|--------|-----------------------------------------------------|
| 201147_s_at  | TIMP3  | TIMP metalloproteinase inhibitor 3                  |
| 201341_at    | ENC1   | ectodermal-neural cortex (with BTB-like domain)     |
| 201399_s_at  | TRAM1  | translocation associated membrane protein 1         |
| 201633_s_at  | CYB5B  | cytochrome b5 type B (outer mitochondrial membrane) |

|             |           |                                                                                                                                                                                                                                                                                                                                               |
|-------------|-----------|-----------------------------------------------------------------------------------------------------------------------------------------------------------------------------------------------------------------------------------------------------------------------------------------------------------------------------------------------|
| 201852_x_at | COL3A1    | collagen, type III, alpha 1                                                                                                                                                                                                                                                                                                                   |
| 201860_s_at | PLAT      | plasminogen activator, tissue                                                                                                                                                                                                                                                                                                                 |
| 201932_at   | LRRC41    | leucine rich repeat containing 41                                                                                                                                                                                                                                                                                                             |
| 202043_s_at | SMS       | spermine synthase; similar to spermine synthase                                                                                                                                                                                                                                                                                               |
| 202061_s_at | SEL1L     | sel-1 suppressor of lin-12-like (C. elegans)                                                                                                                                                                                                                                                                                                  |
| 202062_s_at | SEL1L     | sel-1 suppressor of lin-12-like (C. elegans)                                                                                                                                                                                                                                                                                                  |
| 202705_at   | CCNB2     | cyclin B2                                                                                                                                                                                                                                                                                                                                     |
| 202816_s_at | SS18      | synovial sarcoma translocation, chromosome 18                                                                                                                                                                                                                                                                                                 |
| 202920_at   | ANK2      | ankyrin 2, neuronal                                                                                                                                                                                                                                                                                                                           |
| 203041_s_at | LAMP2     | lysosomal-associated membrane protein 2                                                                                                                                                                                                                                                                                                       |
| 203069_at   | SV2A      | synaptic vesicle glycoprotein 2A                                                                                                                                                                                                                                                                                                              |
| 203179_at   | GALT      | galactose-1-phosphate uridylyltransferase                                                                                                                                                                                                                                                                                                     |
| 203211_s_at | MTMR2     | myotubularin related protein 2                                                                                                                                                                                                                                                                                                                |
| 203441_s_at | CDH2      | cadherin 2, type 1, N-cadherin (neuronal)                                                                                                                                                                                                                                                                                                     |
| 203738_at   | C5orf22   | chromosome 5 open reading frame 22                                                                                                                                                                                                                                                                                                            |
| 203827_at   | WIPI1     | WD repeat domain, phosphoinositide interacting 1                                                                                                                                                                                                                                                                                              |
| 204149_s_at | GSTM4     | glutathione S-transferase mu 4                                                                                                                                                                                                                                                                                                                |
| 204256_at   | ELOVL6    | ELOVL family member 6, elongation of long chain fatty acids (FEN1/Elo2, SUR4/Elo3-like, yeast)                                                                                                                                                                                                                                                |
| 204641_at   | NEK2      | NIMA (never in mitosis gene a)-related kinase 2                                                                                                                                                                                                                                                                                               |
| 204725_s_at | NCK1      | NCK adaptor protein 1                                                                                                                                                                                                                                                                                                                         |
| 204749_at   | NAP1L3    | nucleosome assembly protein 1-like 3                                                                                                                                                                                                                                                                                                          |
| 205523_at   | HAPLN1    | hyaluronan and proteoglycan link protein 1                                                                                                                                                                                                                                                                                                    |
| 205717_x_at | PCDHGC3   | protocadherin gamma subfamily C, 3; protocadherin gamma subfamily C, 5; protocadherin gamma subfamily C, 4; protocadherin gamma subfamily A, 12                                                                                                                                                                                               |
| 205822_s_at | HMGCS1    | 3-hydroxy-3-methylglutaryl-Coenzyme A synthase 1 (soluble)                                                                                                                                                                                                                                                                                    |
| 206369_s_at | PIK3CG    | phosphoinositide-3-kinase, catalytic, gamma polypeptide                                                                                                                                                                                                                                                                                       |
| 206463_s_at | DHRS2     | dehydrogenase/reductase (SDR family) member 2                                                                                                                                                                                                                                                                                                 |
| 207714_s_at | SERPINH1  | serpin peptidase inhibitor, clade H (heat shock protein 47), member 1, (collagen binding protein 1)                                                                                                                                                                                                                                           |
| 208180_s_at | HIST1H4H  | histone cluster 1, H4l; histone cluster 1, H4k; histone cluster 4, H4; histone cluster 1, H4h; histone cluster 1, H4j; histone cluster 1, H4i; histone cluster 1, H4d; histone cluster 1, H4c; histone cluster 1, H4f; histone cluster 1, H4e; histone cluster 1, H4b; histone cluster 1, H4a; histone cluster 2, H4a; histone cluster 2, H4b |
| 208861_s_at | ATRX      | alpha thalassemia/mental retardation syndrome X-linked (RAD54 homolog, S. cerevisiae)                                                                                                                                                                                                                                                         |
| 209079_x_at | PCDHGC3   | protocadherin gamma subfamily C, 3; protocadherin gamma subfamily C, 5; protocadherin gamma subfamily C, 4; protocadherin gamma subfamily A, 12                                                                                                                                                                                               |
| 209118_s_at | TUBA1A    | tubulin, alpha 1a                                                                                                                                                                                                                                                                                                                             |
| 209198_s_at | SYT11     | synaptotagmin XI                                                                                                                                                                                                                                                                                                                              |
| 209208_at   | MPDU1     | mannose-P-dolichol utilization defect 1                                                                                                                                                                                                                                                                                                       |
| 209234_at   | KIF1B     | kinesin family member 1B                                                                                                                                                                                                                                                                                                                      |
| 209295_at   | TNFRSF10B | tumor necrosis factor receptor superfamily, member 10b                                                                                                                                                                                                                                                                                        |
| 209550_at   | NDN       | neccdin homolog (mouse)                                                                                                                                                                                                                                                                                                                       |
| 209846_s_at | BTN3A2    | butyrophilin, subfamily 3, member A2                                                                                                                                                                                                                                                                                                          |

|             |            |                                                                                                                                                 |
|-------------|------------|-------------------------------------------------------------------------------------------------------------------------------------------------|
| 210406_s_at | RAB6C      | RAB6C, member RAS oncogene family; RAB6A, member RAS oncogene family; hypothetical LOC100130819; RAB6C-like                                     |
| 210868_s_at | ELOVL6     | ELOVL family member 6, elongation of long chain fatty acids (FEN1/Elo2, SUR4/Elo3-like, yeast)                                                  |
| 210970_s_at | IBTK       | inhibitor of Bruton agammaglobulinemia tyrosine kinase                                                                                          |
| 211063_s_at | NCK1       | NCK adaptor protein 1                                                                                                                           |
| 211066_x_at | PCDHGC3    | protocadherin gamma subfamily C, 3; protocadherin gamma subfamily C, 5; protocadherin gamma subfamily C, 4; protocadherin gamma subfamily A, 12 |
| 211080_s_at | NEK2       | NIMA (never in mitosis gene a)-related kinase 2                                                                                                 |
| 211162_x_at | SCD        | stearoyl-CoA desaturase (delta-9-desaturase)                                                                                                    |
| 211959_at   | IGFBP5     | insulin-like growth factor binding protein 5                                                                                                    |
| 212274_at   | LPIN1      | lipin 1                                                                                                                                         |
| 212403_at   | UBE3B      | ubiquitin protein ligase E3B                                                                                                                    |
| 212613_at   | BTN3A2     | butyrophilin, subfamily 3, member A2                                                                                                            |
| 213645_at   | ENOSF1     | enolase superfamily member 1                                                                                                                    |
| 214079_at   | DHRS2      | dehydrogenase/reductase (SDR family) member 2                                                                                                   |
| 214642_x_at | MAGEA5     | melanoma antigen family A, 5                                                                                                                    |
| 214710_s_at | CCNB1      | cyclin B1                                                                                                                                       |
| 214945_at   | FAM153B    | family with sequence similarity 153, member B                                                                                                   |
| 215076_s_at | COL3A1     | collagen, type III, alpha 1                                                                                                                     |
| 215836_s_at | PCDHGC3    | protocadherin gamma subfamily C, 3; protocadherin gamma subfamily C, 5; protocadherin gamma subfamily C, 4; protocadherin gamma subfamily A, 12 |
| 217188_s_at | C14orf1    | chromosome 14 open reading frame 1                                                                                                              |
| 217749_at   | COPG1      | coatamer protein complex, subunit gamma                                                                                                         |
| 217977_at   | MSRB1      | selenoprotein X, 1                                                                                                                              |
| 218047_at   | OSBPL9     | oxysterol binding protein-like 9                                                                                                                |
| 218124_at   | RETSAT     | retinol saturase (all-trans-retinol 13,14-reductase)                                                                                            |
| 218150_at   | ARL5A      | ADP-ribosylation factor-like 5A                                                                                                                 |
| 218396_at   | VPS13C     | vacuolar protein sorting 13 homolog C ( <i>S. cerevisiae</i> )                                                                                  |
| 218539_at   | FBXO34     | F-box protein 34                                                                                                                                |
| 219049_at   | CSGALNACT1 | chondroitin sulfate N-acetylgalactosaminyltransferase 1                                                                                         |
| 219730_at   | MED18      | mediator complex subunit 18                                                                                                                     |
| 220205_at   | TPTE       | transmembrane phosphatase with tensin homology                                                                                                  |
| 221730_at   | COL5A2     | collagen, type V, alpha 2                                                                                                                       |
| 222209_s_at | TMEM135    | transmembrane protein 135                                                                                                                       |

#### Cluster 4

| Probe.Set.ID | Symbol  | Gene Title                                                             |
|--------------|---------|------------------------------------------------------------------------|
| 201419_at    | BAP1    | BRCA1 associated protein-1 (ubiquitin carboxy-terminal hydrolase)      |
| 201565_s_at  | ID2     | inhibitor of DNA binding 2, dominant negative helix-loop-helix protein |
| 203489_at    | SIVA1   | SIVA1, apoptosis-inducing factor                                       |
| 204621_s_at  | NR4A2   | nuclear receptor subfamily 4, group A, member 2                        |
| 204770_at    | TAP2    | transporter 2, ATP-binding cassette, sub-family B (MDR/TAP)            |
| 204790_at    | SMAD7   | SMAD family member 7                                                   |
| 206565_x_at  | GUSBP3  | glucuronidase, beta pseudogene                                         |
| 208366_at    | PCDH11X | protocadherin 11 X-linked                                              |
| 209478_at    | STRA13  | stimulated by retinoic acid 13 homolog (mouse)                         |

|             |         |                                                         |
|-------------|---------|---------------------------------------------------------|
| 210792_x_at | SIVA1   | SIVA1, apoptosis-inducing factor                        |
| 213089_at   |         | ENSG00000219982                                         |
| 213147_at   | HOXA10  | homeobox A10                                            |
| 213577_at   | SQLE    | squalene epoxidase                                      |
| 215043_s_at | GUSBP3  | glucuronidase, beta pseudogene                          |
| 215599_at   | GUSBP3  | glucuronidase, beta pseudogene                          |
| 218350_s_at | GMNN    | geminin, DNA replication inhibitor                      |
| 218642_s_at | CHCHD7  | coiled-coil-helix-coiled-coil-helix domain containing 7 |
| 220097_s_at | TMEM104 | transmembrane protein 104                               |
| 220983_s_at | NEAT1   | sprouty homolog 4 (Drosophila)                          |

#### Cluster 5

| Probe.Set.ID | Symbol    | Gene Title                                                                                                                      |
|--------------|-----------|---------------------------------------------------------------------------------------------------------------------------------|
| 201774_s_at  | NCAPD2    | non-SMC condensin I complex, subunit D2                                                                                         |
| 202215_s_at  | NFYC      | nuclear transcription factor Y, gamma                                                                                           |
| 202240_at    | PLK1      | polo-like kinase 1 (Drosophila)                                                                                                 |
| 202736_s_at  | LSM4      | LSM4 homolog, U6 small nuclear RNA associated ( <i>S. cerevisiae</i> )                                                          |
| 203478_at    | NDUFC1    | NADH dehydrogenase (ubiquinone) 1, subcomplex unknown, 1, 6kDa                                                                  |
| 203709_at    | PHKG2     | phosphorylase kinase, gamma 2 (testis)                                                                                          |
| 203719_at    | ERCC1     | excision repair cross-complementing rodent repair deficiency, complementation group 1 (includes overlapping antisense sequence) |
| 203848_at    | AKAP8     | A kinase (PRKA) anchor protein 8                                                                                                |
| 203880_at    | COX17     | COX17 cytochrome c oxidase assembly homolog ( <i>S. cerevisiae</i> )                                                            |
| 203931_s_at  | MRPL12    | mitochondrial ribosomal protein L12                                                                                             |
| 203980_at    | FABP4     | fatty acid binding protein 4, adipocyte                                                                                         |
| 204107_at    | NFYA      | nuclear transcription factor Y, alpha                                                                                           |
| 204108_at    | NFYA      | nuclear transcription factor Y, alpha                                                                                           |
| 204109_s_at  | NFYA      | nuclear transcription factor Y, alpha                                                                                           |
| 204218_at    | ANAPC15   | chromosome 11 open reading frame 51                                                                                             |
| 204475_at    | MMP1      | matrix metalloproteinase 1 (interstitial collagenase)                                                                           |
| 205167_s_at  | CDC25C    | cell division cycle 25 homolog C ( <i>S. pombe</i> )                                                                            |
| 205730_s_at  | ABLIM3    | actin binding LIM protein family, member 3                                                                                      |
| 205828_at    | MMP3      | matrix metalloproteinase 3 (stromelysin 1, progelatinase)                                                                       |
| 206785_s_at  | KLRC1     | killer cell lectin-like receptor subfamily C, member 1                                                                          |
| 209223_at    | NDUFA2    | NADH dehydrogenase (ubiquinone) 1 alpha subcomplex, 2, 8kDa                                                                     |
| 209682_at    | CBLB      | Cas-Br-M (murine) ecotropic retroviral transforming sequence b                                                                  |
| 213322_at    | OARD1     | chromosome 6 open reading frame 130                                                                                             |
| 213893_x_at  | PMS2P2    | PMS2 postmeiotic segregation increased 2 ( <i>S. cerevisiae</i> )-like                                                          |
| 213897_s_at  | MRPL23    | mitochondrial ribosomal protein L23                                                                                             |
| 214073_at    | CTTN      | cortactin                                                                                                                       |
| 214110_s_at  | LOC654342 | lymphocyte-specific protein 1 pseudogene                                                                                        |
| 214756_x_at  | PMS2P1    | postmeiotic segregation increased 2-like 1 pseudogene                                                                           |
| 215293_s_at  | PGAP2     | post-GPI attachment to proteins 2                                                                                               |
| 215380_s_at  | GGCT      | gamma-glutamyl cyclotransferase                                                                                                 |
| 215498_s_at  | MAP2K3    | mitogen-activated protein kinase kinase 3                                                                                       |
| 215499_at    | MAP2K3    | mitogen-activated protein kinase kinase 3                                                                                       |
| 215734_at    | IZUMO4    | chromosome 19 open reading frame 36                                                                                             |

|             |        |                                                             |
|-------------|--------|-------------------------------------------------------------|
| 216852_x_at | IGLJ3  | immunoglobulin lambda joining 3                             |
| 217010_s_at | CDC25C | cell division cycle 25 homolog C (S. pombe)                 |
| 217485_x_at | PMS2P1 | postmeiotic segregation increased 2-like 1 pseudogene       |
| 217907_at   | MRPL18 | mitochondrial ribosomal protein L18                         |
| 218261_at   | AP1M2  | adaptor-related protein complex 1, mu 2 subunit             |
| 218597_s_at | CISD1  | CDGSH iron sulfur domain 1                                  |
| 218609_s_at | NUDT2  | nudix (nucleoside diphosphate linked moiety X)-type motif 2 |
| 218741_at   | CENPM  | centromere protein M                                        |
| 218774_at   | DCPS   | decapping enzyme, scavenger                                 |
| 218866_s_at | POLR3K | polymerase (RNA) III (DNA directed) polypeptide K, 12.3 kDa |
| 219053_s_at | VPS37C | vacuolar protein sorting 37 homolog C (S. cerevisiae)       |
| 220089_at   | L2HGDH | L-2-hydroxyglutarate dehydrogenase                          |
| 221777_at   | RITA1  | chromosome 12 open reading frame 52                         |
| 32259_at    | EZH1   | enhancer of zeste homolog 1 (Drosophila)                    |
| 33304_at    | ISG20  | interferon stimulated exonuclease gene 20kDa                |
| 37462_i_at  | SF3A2  | splicing factor 3a, subunit 2, 66kDa                        |
| 40569_at    | MZF1   | myeloid zinc finger 1                                       |
| 41858_at    | PGAP2  | post-GPI attachment to proteins 2                           |
| 65517_at    | AP1M2  | adaptor-related protein complex 1, mu 2 subunit             |
