# Supplementary material for: E2F1-Mediated Induction of NFYB Attenuates Apoptosis via Joint Regulation of a Pro-Survival Transcriptional Program
Source: PubMed Central journal article supplement (PMC4454684; doi:10.1371/journal.pone.0127951), 2015-06-03
Supplement: pone.0127951.s006.pdf [file pone.0127951.s006.pdf]

| Probe.Set.ID | Symbol  | Gene Title                                                                                              |
|--------------|---------|---------------------------------------------------------------------------------------------------------|
| 200762_at    | DPYSL2  | dihydropyrimidinase-like 2                                                                              |
| 201283_s_at  | TRAK1   | trafficking protein, kinesin binding 1                                                                  |
| 201688_s_at  | TPD52   | tumor protein D52                                                                                       |
| 201689_s_at  | TPD52   | tumor protein D52                                                                                       |
| 201693_s_at  | EGR1    | early growth response 1                                                                                 |
| 201711_x_at  | RANBP2  | RAN binding protein 2                                                                                   |
| 202035_s_at  | SFRP1   | secreted frizzled-related protein 1                                                                     |
| 202036_s_at  | SFRP1   | secreted frizzled-related protein 1                                                                     |
| 202037_s_at  | SFRP1   | secreted frizzled-related protein 1                                                                     |
| 202178_at    | PRKCZ   | protein kinase C, zeta                                                                                  |
| 202236_s_at  | SLC16A1 | solute carrier family 16 (monocarboxylic acid transporters), member 1                                   |
| 202583_s_at  | RANBP9  | RAN binding protein 9                                                                                   |
| 202670_at    | MAP2K1  | mitogen-activated protein kinase kinase 1                                                               |
| 202842_s_at  | DNAJB9  | DnaJ (Hsp40) homolog, subfamily B, member 9                                                             |
| 202843_at    | DNAJB9  | ralA binding protein 1                                                                                  |
| 202948_at    | IL1R1   | interleukin 1 receptor, type I                                                                          |
| 203044_at    | CHSY1   | carbohydrate (chondroitin) synthase 1                                                                   |
| 203057_s_at  | PRDM2   | PR domain containing 2, with ZNF domain                                                                 |
| 203072_at    | MYO1E   | myosin IE                                                                                               |
| 203311_s_at  | ARF6    | ADP-ribosylation factor 6                                                                               |
| 203520_s_at  | ZNF318  | zinc finger protein 318                                                                                 |
| 203625_x_at  | SKP2    | S-phase kinase-associated protein 2 (p45)                                                               |
| 203641_s_at  | COBLL1  | COBL-like 1                                                                                             |
| 203689_s_at  | FMR1    | fragile X mental retardation 1                                                                          |
| 203935_at    | ACVR1   | activin A receptor, type I                                                                              |
| 204062_s_at  | ULK2    | unc-51-like kinase 2 (C. elegans)                                                                       |
| 204145_at    | FRG1    | FSHD region gene 1                                                                                      |
| 204160_s_at  | ENPP4   | ectonucleotide pyrophosphatase/phosphodiesterase 4 (putative function)                                  |
| 204161_s_at  | ENPP4   | ectonucleotide pyrophosphatase/phosphodiesterase 4 (putative function)                                  |
| 204184_s_at  | ADRBK2  | adrenergic, beta, receptor kinase 2                                                                     |
| 204194_at    | BACH1   | BTB and CNC homology 1, basic leucine zipper transcription factor 1                                     |
| 204249_s_at  | LMO2    | LIM domain only 2 (rhombotin-like 1)                                                                    |
| 204392_at    | CAMK1   | calcium/calmodulin-dependent protein kinase I                                                           |
| 204479_at    | OSTF1   | osteoclast stimulating factor 1                                                                         |
| 204497_at    | ADCY9   | adenylate cyclase 9                                                                                     |
| 204507_s_at  | PPP3R1  | protein phosphatase 3 (formerly 2B), regulatory subunit B, 19kDa, alpha isoform (calcineurin B, type I) |
| 204526_s_at  | TBC1D8  | TBC1 domain family, member 8 (with GRAM domain)                                                         |
| 204720_s_at  | DNAJC6  | DnaJ (Hsp40) homolog, subfamily C, member 6                                                             |
| 204748_at    | PTGS2   | prostaglandin-endoperoxide synthase 2 (prostaglandin G/H synthase and cyclooxygenase)                   |
| 204832_s_at  | BMPR1A  | bone morphogenetic protein receptor, type IA                                                            |
| 204953_at    | SNAP91  | synaptosomal-associated protein, 91kDa homolog (mouse)                                                  |
| 204984_at    | GPC4    | glypican 4                                                                                              |
| 204989_s_at  | ITGB4   | integrin, beta 4                                                                                        |
| 205015_s_at  | TGFA    | transforming growth factor, alpha                                                                       |

|             |         |                                                                                                               |
|-------------|---------|---------------------------------------------------------------------------------------------------------------|
| 205016_at   | TGFA    | transforming growth factor, alpha                                                                             |
| 205123_s_at | TMEFF1  | transmembrane protein with EGF-like and two follistatin-like domains 1                                        |
| 205164_at   | GCAT    | glycine C-acetyltransferase (2-amino-3-ketobutyrate coenzyme A ligase)                                        |
| 205333_s_at | RCE1    | RCE1 homolog, prenyl protein peptidase ( <i>S. cerevisiae</i> )                                               |
| 205462_s_at | HPCAL1  | hippocalcin-like 1                                                                                            |
| 205478_at   | PPP1R1A | protein phosphatase 1, regulatory (inhibitor) subunit 1A                                                      |
| 205789_at   | CD1D    | CD1d molecule /// CD1d molecule                                                                               |
| 205842_s_at | JAK2    | Janus kinase 2 (a protein tyrosine kinase)                                                                    |
| 205850_s_at | GABRB3  | gamma-aminobutyric acid (GABA) A receptor, beta 3                                                             |
| 205860_x_at | FOLH1   | folate hydrolase (prostate-specific membrane antigen) 1                                                       |
| 206159_at   | GDF10   | growth differentiation factor 10                                                                              |
| 206176_at   | BMP6    | bone morphogenetic protein 6                                                                                  |
| 206233_at   | B4GALT6 | UDP-Gal:betaGlcNAc beta 1,4- galactosyltransferase, polypeptide 6                                             |
| 206456_at   | GABRA5  | gamma-aminobutyric acid (GABA) A receptor, alpha 5                                                            |
| 206511_s_at | SIX2    | sine oculis homeobox homolog 2 ( <i>Drosophila</i> )                                                          |
| 206615_s_at | ADAM22  | ADAM metallopeptidase domain 22                                                                               |
| 207150_at   | SLC18A3 | solute carrier family 18 (vesicular acetylcholine), member 3                                                  |
| 207265_s_at | KDEL3   | KDEL (Lys-Asp-Glu-Leu) endoplasmic reticulum protein retention receptor 3                                     |
| 207275_s_at | ACSL1   | acyl-CoA synthetase long-chain family member 1                                                                |
| 207362_at   | SLC30A4 | solute carrier family 30 (zinc transporter), member 4                                                         |
| 207767_s_at | EGR4    | early growth response 4                                                                                       |
| 207768_at   | EGR4    | early growth response 4                                                                                       |
| 207781_s_at | ZNF711  | zinc finger protein 711                                                                                       |
| 207824_s_at | MAZ     | MYC-associated zinc finger protein (purine-binding transcription factor)                                      |
| 208237_x_at | ADAM22  | ADAM metallopeptidase domain 22                                                                               |
| 208244_at   | BMP3    | bone morphogenetic protein 3 (osteogenic)                                                                     |
| 208264_s_at | EIF3J   | eukaryotic translation initiation factor 3, subunit 1 alpha, 35kDa                                            |
| 208606_s_at | WNT4    | wingless-type MMTV integration site family, member 4 /// wingless-type MMTV integration site family, member 4 |
| 208652_at   | PPP2CA  | protein phosphatase 2 (formerly 2A), catalytic subunit, alpha isoform                                         |
| 208985_s_at | EIF3J   | eukaryotic translation initiation factor 3, subunit 1 alpha, 35kDa                                            |
| 208990_s_at | HNRNPH3 | heterogeneous nuclear ribonucleoprotein H3 (2H9)                                                              |
| 209098_s_at | JAG1    | jagged 1 (Alagille syndrome)                                                                                  |
| 209112_at   | CDKN1B  | cyclin-dependent kinase inhibitor 1B (p27, Kip1)                                                              |
| 209281_s_at | ATP2B1  | ATPase, Ca <sup>++</sup> transporting, plasma membrane 1                                                      |
| 209339_at   | SIAH2   | seven in absentia homolog 2 ( <i>Drosophila</i> ) /// seven in absentia homolog 2 ( <i>Drosophila</i> )       |
| 209347_s_at | MAF     | v-maf musculoaponeurotic fibrosarcoma oncogene homolog (avian)                                                |
| 209569_x_at | NSG1    | Neuron specific gene family member 1                                                                          |
| 209570_s_at | NSG1    | Neuron specific gene family member 1                                                                          |
| 209590_at   | BMP7    | Bone morphogenetic protein 7 (osteogenic protein 1)                                                           |
| 209591_s_at | BMP7    | bone morphogenetic protein 7 (osteogenic protein 1)                                                           |
| 209990_s_at | GABBR2  | gamma-aminobutyric acid (GABA) B receptor, 2                                                                  |
| 210021_s_at | CCNO    | uracil-DNA glycosylase 2                                                                                      |
| 210127_at   | RAB6B   | RAB6B, member RAS oncogene family                                                                             |
| 210190_at   | STX11   | syntaxin 11                                                                                                   |
| 210240_s_at | CDKN2D  | cyclin-dependent kinase inhibitor 2D (p19, inhibits CDK4)                                                     |

|             |          |                                                                                                                               |
|-------------|----------|-------------------------------------------------------------------------------------------------------------------------------|
| 210355_at   | PTHLH    | parathyroid hormone-like hormone                                                                                              |
| 210447_at   | GLUD2    | glutamate dehydrogenase 2                                                                                                     |
| 210480_s_at | MYO6     | myosin VI                                                                                                                     |
| 210540_s_at | B4GALT4  | UDP-Gal:betaGlcNAc beta 1,4- galactosyltransferase, polypeptide 4                                                             |
| 210555_s_at | NFATC3   | nuclear factor of activated T-cells, cytoplasmic, calcineurin-dependent 3                                                     |
| 210716_s_at | CLIP1    | restin (Reed-Steinberg cell-expressed intermediate filament-associated protein)                                               |
| 210829_s_at | SSBP2    | single-stranded DNA binding protein 2                                                                                         |
| 210875_s_at | ZEB1     | transcription factor 8 (represses interleukin 2 expression)                                                                   |
| 211067_s_at | GAS7     | growth arrest-specific 7 /// growth arrest-specific 7                                                                         |
| 211171_s_at | PDE10A   | phosphodiesterase 10A                                                                                                         |
| 211379_x_at | B3GALNT1 | UDP-GalNAc:betaGlcNAc beta 1,3-galactosaminyltransferase, polypeptide 1 (Globoside blood group)                               |
| 211478_s_at | DPP4     | dipeptidyl-peptidase 4 (CD26, adenosine deaminase complexing protein 2)                                                       |
| 211631_x_at | B4GALT1  | UDP-Gal:betaGlcNAc beta 1,4- galactosyltransferase, polypeptide 1                                                             |
| 211812_s_at | B3GALNT1 | UDP-GalNAc:betaGlcNAc beta 1,3-galactosaminyltransferase, polypeptide 1 (Globoside blood group)                               |
| 211985_s_at | CALM1    | calmodulin 1 (phosphorylase kinase, delta)                                                                                    |
| 212056_at   | GSE1     | KIAA0182                                                                                                                      |
| 212209_at   | MED13L   | thyroid hormone receptor associated protein 2                                                                                 |
| 212435_at   | TRIM33   | tripartite motif-containing 33                                                                                                |
| 212447_at   | KBTBD2   | kelch repeat and BTB (POZ) domain containing 2                                                                                |
| 212521_s_at | PDE8A    | phosphodiesterase 8A                                                                                                          |
| 212750_at   | PPP1R16B | protein phosphatase 1, regulatory (inhibitor) subunit 16B                                                                     |
| 212812_at   | SERINC5  | Serine incorporator 5                                                                                                         |
| 212870_at   | SOS2     | Ras association (RalGDS/AF-6) domain family 3                                                                                 |
| 212930_at   | ATP2B1   | ATPase, Ca <sup>++</sup> transporting, plasma membrane 1                                                                      |
| 212986_s_at | TLK2     | tousled-like kinase 2                                                                                                         |
| 213353_at   | ABCA5    | ATP-binding cassette, sub-family A (ABC1), member 5                                                                           |
| 213469_at   | PGAP1    | GPI deacylase                                                                                                                 |
| 213470_s_at | HNRNPH1  | heterogeneous nuclear ribonucleoprotein H1 (H)                                                                                |
| 213533_at   | NSG1     | Neuron specific gene family member 1                                                                                          |
| 213695_at   | PON3     | paraoxonase 3                                                                                                                 |
| 213906_at   | MYBL1    | v-myb myeloblastosis viral oncogene homolog (avian)-like 1                                                                    |
| 214449_s_at | RHOQ     | ras homolog gene family, member Q                                                                                             |
| 214543_x_at | QKI      | quaking homolog, KH domain RNA binding (mouse)                                                                                |
| 214578_s_at | ROCK1    | similar to Rho-associated protein kinase 1 (Rho-associated, coiled-coil containing protein kinase 1) (p160 ROCK-1) (p160ROCK) |
| 214691_x_at | FAM63B   | family with sequence similarity 63, member B                                                                                  |
| 214790_at   | SENP6    | SUMO1/sentrin specific peptidase 6                                                                                            |
| 214890_s_at | FAM149A  | DKFZP564J102 protein                                                                                                          |
| 214954_at   | SUSD5    | sushi domain containing 5                                                                                                     |
| 215245_x_at | FMR1     | fragile X mental retardation 1                                                                                                |
| 215363_x_at | FOLH1    | folate hydrolase (prostate-specific membrane antigen) 1                                                                       |
| 215716_s_at | ATP2B1   | ATPase, Ca <sup>++</sup> transporting, plasma membrane 1                                                                      |
| 215794_x_at | GLUD1    | glutamate dehydrogenase 2                                                                                                     |
| 216125_s_at | RANBP9   | RAN binding protein 9                                                                                                         |

|             |            |                                                                                             |
|-------------|------------|---------------------------------------------------------------------------------------------|
| 216255_s_at | GRM8       | glutamate receptor, metabotropic 8                                                          |
| 216256_at   | GRM8       | glutamate receptor, metabotropic 8                                                          |
| 216350_s_at | ZNF10      | zinc finger protein 10                                                                      |
| 216488_s_at | ATP11A     | ATPase, Class VI, type 11A                                                                  |
| 216521_s_at | BRCC3      | BRCA1/BRCA2-containing complex, subunit 3                                                   |
| 216627_s_at | B4GALT1    | UDP-Gal:betaGlcNAc beta 1,4- galactosyltransferase, polypeptide 1                           |
| 216870_x_at | DLEU2      | deleted in lymphocytic leukemia, 2                                                          |
| 216953_s_at | WT1        | Wilms tumor 1                                                                               |
| 217280_x_at | GABRA5     | gamma-aminobutyric acid (GABA) A receptor, alpha 5                                          |
| 217644_s_at | SOS2       | son of sevenless homolog 2 (Drosophila)                                                     |
| 217920_at   | MAN1A2     | mannosidase, alpha, class 1A, member 2                                                      |
| 218127_at   | NFYB       | nuclear transcription factor Y, beta                                                        |
| 218128_at   | NFYB       | nuclear transcription factor Y, beta                                                        |
| 218129_s_at | NFYB       | nuclear transcription factor Y, beta                                                        |
| 218182_s_at | CLDN1      | claudin 1                                                                                   |
| 218223_s_at | PLEKHO1    | pleckstrin homology domain containing, family O member 1                                    |
| 218319_at   | PEL1       | pellino homolog 1 (Drosophila)                                                              |
| 218499_at   | MST4       | Mst3 and SOK1-related kinase                                                                |
| 219312_s_at | ZBTB10     | zinc finger and BTB domain containing 10                                                    |
| 219631_at   | LRP12      | low density lipoprotein-related protein 12                                                  |
| 219703_at   | MNS1       | meiosis-specific nuclear structural 1                                                       |
| 219778_at   | ZFPM2      | zinc finger protein, multitype 2                                                            |
| 219797_at   | MGAT4A     | mannosyl (alpha-1,3-)-glycoprotein beta-1,4-N-acetylglucosaminyltransferase, isozyme A      |
| 219864_s_at | RCAN3      | Down syndrome critical region gene 1-like 2                                                 |
| 219892_at   | TM6SF1     | transmembrane 6 superfamily member 1                                                        |
| 219932_at   | SLC27A6    | solute carrier family 27 (fatty acid transporter), member 6                                 |
| 220014_at   | PRR16      | mesenchymal stem cell protein DSC54                                                         |
| 220120_s_at | EPB41L4A   | erythrocyte membrane protein band 4.1 like 4A                                               |
| 220253_s_at | LRP12      | low density lipoprotein-related protein 12                                                  |
| 220254_at   | LRP12      | low density lipoprotein-related protein 12                                                  |
| 220265_at   | GPR107     | G protein-coupled receptor 107                                                              |
| 220386_s_at | EML4       | echinoderm microtubule associated protein like 4                                            |
| 220955_x_at | RAB23      | RAB23, member RAS oncogene family                                                           |
| 221039_s_at | ASAP1      | development and differentiation enhancing factor 1                                          |
| 221268_s_at | SGPP1      | sphingosine-1-phosphate phosphatase 1 /// sphingosine-1-phosphate phosphatase 1             |
| 221428_s_at | TBL1XR1    | transducin (beta)-like 1X-linked receptor 1 /// transducin (beta)-like 1X-linked receptor 1 |
| 221814_at   | GPR124     | G protein-coupled receptor 124                                                              |
| 222071_s_at | SLCO4C1    | solute carrier organic anion transporter family, member 4C1                                 |
| 222121_at   | ARHGEF26   | Src homology 3 domain-containing guanine nucleotide exchange factor                         |
| 222235_s_at | CSGALNACT2 | chondroitin sulfate GalNAcT-2                                                               |
| 41577_at    | PPP1R16B   | protein phosphatase 1, regulatory (inhibitor) subunit 16B                                   |
| 59644_at    | BMP2K      | BMP2 inducible kinase                                                                       |
